# Supplementary material for: FAK-Dependent Cell Motility and Cell Elongation
Source: MDPI journal article supplement (doi:10.3390/cells9010192), 2020-01-12
Supplement: s1 [file s1]

## **1. Materials and Methods**

### **1.1. Cell culture**

Fibroblasts (NIH 3T3) were cultured using a 1:1 mixture of Dulbecco's modified Eagle's medium and nutrient mixture (F-12; Gibco, Grand Island, NY), pH 7.4, containing 50 units/mL of penicillin, 50  $\mu\text{g/mL}$  of streptomycin, and 10% fetal bovine serum (Gibco). The cells were maintained at 37°C in a humidified, 5% CO<sub>2</sub> atmosphere.

### **1.2. Cell adhesive micropattern substrate**

Micropatterned cell culture dishes were purchased from Matsunami (CytoGraph; DNP, Tokyo, Japan). The glass surface micropatterns were printed alternately with hydrophobic or hydrophilic printing patterns with intervals of 10, 15, 30, or 60  $\mu\text{m}$ . On a hydrophobic region, the cells do not adhere to the glass surface, thus allowing the control of cell proliferation and cell elongation in a limited space. Living fibroblasts harvested on adhesive micropatterns were observed under phase contrast microscopy (IX-70; Olympus, Tokyo, Japan).
